# Supplementary material
Source: PubMed Central journal article supplement (PMC6973710)
Supplement: 41997_2010_BF03405622_MOESM1_ESM.pdf [file 41997_2010_BF03405622_MOESM1_ESM.pdf]

# Surveillance et évaluation des politiques de nutrition et d'activité physique en milieu scolaire

Jennifer P. Taylor, Ph.D., R.D.,<sup>1</sup> Mary L. McKenna, Ph.D., R.D.,<sup>2</sup> Gregory P. Butler, M.Sc.<sup>3</sup>

## RÉSUMÉ

Compte tenu du nombre croissant d'administrations canadiennes disposant de politiques de nutrition ou d'activité physique en milieu scolaire, la nécessité se fait sentir d'évaluer l'efficacité de ces politiques. Le présent article vise les objectifs suivants : 1) fournir un aperçu des principales problématiques entourant la surveillance et l'évaluation des politiques de nutrition et d'activité physique en milieu scolaire au Canada et 2) identifier les domaines où des recherches ultérieures s'imposent pour renforcer les données probantes et guider l'élaboration d'approches efficaces en matière de surveillance et d'évaluation. Cet article examine les indicateurs, les sources de données et les outils d'évaluation existants dans les domaines de la nutrition et de l'activité physique. Il insiste sur l'importance d'identifier des approches et indicateurs communs, d'adopter une approche globale s'inscrivant dans le cadre de l'Organisation mondiale de la Santé (OMS) et de s'assurer que la capacité de recherche et le financement soient suffisants pour augmenter l'efficacité des démarches d'évaluation à l'avenir.

**Mots clés :** politique de nutrition; politique d'activité physique; évaluation; santé en milieu scolaire

On observe actuellement un consensus dans la communauté scientifique et chez les parties intéressées à l'effet que l'adoption de certaines mesures au niveau des écoles ou des districts scolaires, entre autres l'adoption de politiques de nutrition et d'activité physique, devrait être une priorité essentielle. De telles mesures pourraient en effet créer un environnement favorisant l'activité physique et les choix alimentaires sains chez les enfants, ce qui réduira à long terme les taux de morbidité et de mortalité associés à l'augmentation inquiétante du nombre d'enfants obèses ou ayant un excès de poids.<sup>1-3</sup> C'est pourquoi des provinces et territoires du Canada ont adopté des politiques de nutrition et d'activité physique au cours des dernières années,<sup>4</sup> tandis que d'autres encouragent leurs écoles et districts scolaires à faire de même. Cet état de fait entraîne la nécessité d'évaluer l'efficacité de telles politiques.<sup>5</sup> Il est en effet essentiel d'évaluer les politiques de nutrition et d'activité physique en milieu scolaire pour être en mesure d'améliorer leur contenu, de mieux les appuyer, d'assurer leur mise en œuvre et de veiller à ce qu'elles atteignent leurs objectifs sans perdre de vue l'évolution des besoins au niveau des gouvernements et des écoles.<sup>6,7</sup> Par ailleurs, l'évaluation permet de vérifier l'utilisation des ressources pendant le processus d'élaboration, le niveau de participation des parties intéressées, l'ampleur de la mise en œuvre des politiques ainsi que leurs conséquences prévues et imprévues. Finalement, l'évaluation favorise la reddition de compte tant attendue par les parties intéressées et les bailleurs de fonds. En plus de permettre un renforcement des données probantes pouvant orienter les décisions ultérieures, elle inspire parfois des approches innovatrices en matière d'évaluation.<sup>1</sup>

Le document de l'OMS intitulé *Stratégie mondiale pour l'alimentation, l'exercice physique et la santé : cadre de surveillance et d'évaluation de la mise en œuvre*<sup>6</sup> publié en 2006, présente les principales problématiques entourant la surveillance et l'évaluation des politiques de

nutrition et d'activité physique; il fournit en outre un cadre structurel à cet égard. L'OMS définit la surveillance et l'évaluation comme « des processus systématiques qui permettent d'évaluer l'avancement des travaux en cours et de repérer d'éventuelles difficultés pour y remédier précocement. La surveillance et l'évaluation permettent de mesurer l'efficacité des programmes en fonction des résultats attendus. »<sup>6</sup>

## Cadre d'évaluation de l'OMS

Dans le cadre de surveillance et d'évaluation entourant la mise en œuvre de la Stratégie mondiale pour l'alimentation, l'exercice physique et la santé de l'OMS, on affirme ce qui suit : « on peut intégrer des indicateurs de la surveillance et de l'évaluation dans le processus de changement de comportement ». <sup>6</sup> Ce cadre recommande que les activités de surveillance et d'évaluation se déroulent en cinq étapes : 1) s'assurer qu'un cadre de surveillance et d'évaluation soit intégré lors de l'élaboration de la stratégie, 2) recenser les activités de surveillance et d'évaluation en cours, 3) sélectionner des indicateurs permettant de surveiller les progrès, 4) procéder à des activités d'évaluation uniformes sur une base continue et 5) répéter les évaluations.<sup>6</sup> Le cadre d'évaluation devrait idéalement être conçu au moment

## Affiliations des auteurs

1. Professeure agrégée, département de la famille et des sciences de la nutrition de l'Université de l'Île-du-Prince-Édouard, Charlottetown (Î.-P.-É.)

2. Professeure, département de kinésiologie, Université du Nouveau-Brunswick, Frédéricton (N.-B.)

3. Analyse de recherche, Unité des modes de vie sains, Centre pour la promotion de la santé, Agence de la santé publique du Canada, Ottawa (Ontario)

**Correspondance et demandes de réimpression :** Jennifer Taylor, Ph.D., département de la famille et des sciences de la nutrition, Université de l'Île-du-Prince-Édouard, 550, avenue University, Charlottetown (Î.-P.-É.) C1A 4P3, Tél. : 902-566-0475, Téléc. : 902-628-4367, Courriel : jtaylor@upei.ca

**Conflit d'intérêts :** Aucun à déclarer.

même de l'élaboration des politiques. Voici quelques questions pour guider la conception des activités d'évaluation : Quelles données seront les plus utiles pour améliorer la mise en œuvre des politiques et permettre l'atteinte de leurs objectifs ? Quels indicateurs validés existent déjà pour faciliter l'évaluation ? Existe-t-il des sources de données qui pourraient guider l'évaluation ? Est-il possible d'utiliser des instruments de mesure normalisés dans le cadre de la démarche d'évaluation pour favoriser une meilleure comparabilité entre les administrations ? Quels sont les besoins des différentes parties intéressées ? Le document de l'OMS fournit un cadre permettant d'identifier les principales questions entourant l'évaluation des politiques de nutrition et d'activité physique. Le présent article tente d'identifier les questions pertinentes dans le contexte canadien en s'inspirant du cadre de l'OMS. Voici les objectifs spécifiques du présent document : 1) fournir un aperçu des principales questions entourant la surveillance et l'évaluation des politiques de nutrition et d'activité physique en milieu scolaire au Canada et 2) identifier les domaines où des recherches ultérieures s'imposent pour renforcer les données probantes et guider l'élaboration d'approches efficaces en matière de surveillance et d'évaluation.

## MÉTHODOLOGIE

Nous avons pris en compte tous les documents s'appuyant sur des données primaires et les documents de synthèse traitant spécifiquement de l'évaluation des politiques de nutrition en milieu scolaire, publiés entre janvier 1992 et janvier 2009 inclusivement. Nous avons effectué une recherche dans les bases de données MEDLINE, Highwire Press, CINAHL, SCOPUS et Google Scholar à partir des mots clés suivants : politique de nutrition en milieu scolaire, politique d'activité physique en milieu scolaire, évaluation des politiques de nutrition, politique d'alimentation en milieu scolaire.

## RÉSULTATS

### Principales problématiques entourant l'évaluation des politiques de nutrition et d'activité physique

#### *Indicateurs de l'évaluation*

Le rapport de l'OMS sur l'alimentation, l'exercice physique et la santé<sup>6</sup> identifie des indicateurs du processus, des extrants et des résultats pouvant être utilisés lors de l'évaluation d'une politique de nutrition. Les indicateurs du processus mesurent les progrès accomplis et la façon d'exécuter les tâches. Les indicateurs des extrants mesurent les produits découlant du processus, tandis que les indicateurs des résultats mesurent les résultats finaux des actions entreprises, comme les changements au niveau des connaissances ou des comportements ou l'impact sur la santé. Ce document présente les indicateurs du processus et des extrants pouvant être utilisés lors du processus d'élaboration des politiques (p. ex. le nombre et le type de parties intéressées participant à ce processus et la nature de leur participation), les aliments offerts dans les écoles (p. ex. le pourcentage d'écoles qui limitent l'offre de produits riches en matières grasses, en sucre et en sel dans tous les endroits mentionnés dans l'autoévaluation; les inspections indépendantes des services alimentaires scolaires), un milieu scolaire sain (p. ex. le pourcentage du personnel qui récompense les élèves par d'autres moyens que des aliments pour souligner leurs réalisations ou leur comportement), l'éducation en santé en milieu scolaire (p. ex. le pourcentage

d'écoles qui enseignent la politique de nutrition dans le cadre de leurs programmes d'enseignement), les services de santé, d'orientation et de soutien social en milieu scolaire (p. ex. le pourcentage d'écoles qui offrent des services de soutien social en nutrition); la participation et la sensibilisation de la collectivité et des familles (p. ex. le pourcentage d'écoles ayant adopté une politique encourageant la participation des familles et de la collectivité à la promotion et à la défense d'une saine alimentation). On y retrouve aussi des indicateurs de résultats à court terme, comme le pourcentage d'élèves dont la consommation alimentaire à l'école respecte les lignes directrices en matière d'alimentation et le pourcentage d'élèves qui ont un poids santé.

Les indicateurs du processus, des extrants et des résultats sont les mêmes dans le cas de l'activité physique que dans celui de la nutrition.<sup>6</sup> En tant qu'exemples d'indicateurs du processus et des extrants, soulignons le pourcentage d'écoles qui offrent quotidiennement des cours d'éducation physique ayant la durée minimale indiquée dans les politiques (sous-)nationales et le pourcentage d'écoles ayant adopté une politique et un programme de transport actif. Parmi les exemples d'indicateurs des résultats, mentionnons le pourcentage d'élèves qui atteignent un niveau d'activité physique de modéré à intense dans les cours d'éducation physique et le pourcentage d'élèves qui s'affirment satisfaits des occasions d'activité physique offertes.<sup>8</sup> Il importe de souligner que même si l'évaluation est d'abord axée sur les pays et les écoles, une grande partie des données et des indicateurs doivent être recueillis à tous les niveaux pertinents (p. ex. écoles, districts scolaires, provinces ou états, et/ou pays).

#### *Sources de données*

Parmi les sources de données entourant l'évaluation et la surveillance, on retrouve des données de surveillance en santé, des renseignements provenant d'évaluations antérieures, des entrevues, des données administratives et des données de sondage. Les sources de données propres à la nutrition sont les observations des boissons et aliments offerts en milieu scolaire, la documentation sur la commercialisation des aliments, la consommation observée ou auto-déclarée d'aliments et de boissons ou des habitudes alimentaires ainsi que les mesures directes du poids, de la taille et d'autres indicateurs de la santé. Dans le domaine de l'activité physique, on peut utiliser certains instruments permettant de prendre des mesures directes, comme un podomètre ou un accéléromètre, examiner les politiques et programmes entourant les cours d'éducation physique, surveiller la pratique de l'activité physique ou des sports entre les cours et après les cours, examiner les politiques entourant le transport actif pour se rendre à l'école et utiliser des mesures directes du poids, de la taille et d'autres indicateurs de la santé. Il est toutefois important de choisir les indicateurs d'évaluation en fonction des objectifs des politiques. Ainsi, on ne peut pas mesurer la réussite d'une politique de distribution gratuite de fruits et légumes, ou d'un plan de transport actif à l'intention des élèves, uniquement à partir de l'impact de ces interventions sur l'indice de masse corporelle des élèves. En plus d'être irréaliste, cette façon de procéder ne tient pas compte des autres avantages potentiels de la nutrition ou de l'activité physique.

#### *Outils existants (nutrition)*

De nombreux outils permettent d'évaluer l'exhaustivité et la rigueur des politiques de nutrition en milieu scolaire.<sup>9-12</sup> Ceux-ci

permettent de recueillir des informations sur les politiques et les pratiques scolaires, l'offre d'aliments concurrentiels et le contenu des repas offerts à l'école, s'il y a lieu. Les États-Unis mènent une étude sur les politiques et programmes de santé en milieu scolaire [*School Health Policies and Programs Study*] à tous les six ans. Cette étude permet de recueillir des réponses détaillées à certaines questions entourant les politiques d'alimentation et de nutrition à l'échelon des états, des districts scolaires et des écoles.<sup>13</sup> L'*Institute of Medicine*<sup>7</sup> suggère plutôt d'utiliser l'Enquête sur les comportements à risque chez les jeunes [*Youth Risk Behavior Survey*] des *Centers for Disease Control and Prevention* pour évaluer les progrès suite à la mise en œuvre de normes nutritionnelles en milieu scolaire. Les informations ainsi recueillies ne permettent toutefois pas de vérifier les changements spécifiques apportés par les élèves suite à l'adoption de politiques de nutrition en milieu scolaire. Le Canada ne dispose pas de données nationales comparables à l'heure actuelle. Les provinces et certains districts scolaires conçoivent plutôt leurs propres enquêtes sur les aliments vendus et servis dans les écoles. La nature et la précision des renseignements ainsi recueillis varient d'une province à l'autre.<sup>14-16</sup> Au Canada, on offre un outil en ligne, le Planificateur des écoles en santé (PES), qui a été conçu par le Consortium conjoint pour les écoles en santé (CCES), en partenariat avec l'Université de Waterloo, en s'appuyant sur le Système d'intervention, de planification et d'évaluation de la santé dans les écoles (SIPESE) de cette Université. Le PES comprend des fonctions de mesure, de planification et d'évaluation entourant les quatre piliers de l'approche globale de la santé en milieu scolaire; il tient compte de trois concepts reliés à la santé, à savoir la saine alimentation, l'activité physique et le tabagisme. En plus d'encourager une démarche d'autoévaluation par les écoles, le PES permet de préparer des rapports régionaux sur la santé à partir des données recueillies dans chaque milieu scolaire.<sup>17</sup>

L'évaluation de la mise en œuvre et du respect des politiques de nutrition, notamment des normes nutritionnelles, représente un défi considérable au Canada. Tout d'abord, la nature des services alimentaires varie d'une province à l'autre et d'un district scolaire à l'autre. Les fournisseurs en alimentation peuvent aussi bien être de grandes sociétés internationales qui peuvent fournir des données sur la composition des aliments que des traiteurs privés qui, en raison de leur petite taille et du manque de ressources, ne sont pas en mesure de fournir les données détaillées sur la composition des aliments qui permettraient de vérifier si les aliments et boissons vendus respectent les politiques de nutrition en milieu scolaire. Cette situation est très différente de celle observée aux États-Unis où le programme national de dîners à l'école [*National School Lunch Program*] est évalué à partir de normes fondées sur les repas; ce pays attribue également un financement suffisant pour appuyer les démarches d'évaluation.<sup>18</sup> Certaines provinces sont en train de vérifier si les aliments servis dans les écoles primaires respectent les normes nutritionnelles spécifiées dans les politiques de nutrition.

#### *Outils existants (activité physique)*

Compte tenu de la grande variété d'activités physiques possibles en milieu scolaire, il est plutôt difficile de répertorier tous les instruments de mesure potentiels. Au Canada, on utilise le questionnaire du SIPESE qui comprend un module sur l'activité physique et tient également compte de l'environnement alimentaire. Ce module permet de recueillir des renseignements sur les activités physiques pra-

tiquées par chaque élève à l'école et aussi de recueillir des données auprès de l'administration scolaire sur les programmes d'activité physique offerts par l'école et les politiques adoptées à cet égard.<sup>17</sup> Dans le cadre de l'Étude sur l'activité physique des jeunes au Canada (EAPJC)<sup>19</sup> (une étude qui ne se limite pas au milieu scolaire), on mesure l'activité physique à l'aide de podomètres. L'Enquête de l'OMS sur les comportements liés à la santé des enfants d'âge scolaire [*Health Behaviours of School-Aged Children*], menée entre autres au Canada, est un exemple d'enquête s'appuyant sur des données auto-déclarées.<sup>20</sup> Aux États-Unis, la *School Health Policies and Programs Study* [Étude sur les politiques et les programmes de santé en milieu scolaire] des *Centers for Disease Control and Prevention* permet à la fois de recueillir des renseignements sur l'alimentation et la nutrition et d'examiner divers programmes et politiques en matière d'activité physique. Cette étude révèle les pourcentages d'états, de districts scolaires et d'écoles qui disposent de politiques et programmes entourant différentes composantes de l'activité physique en milieu scolaire.<sup>21</sup>

L'utilisation des outils disponibles à l'heure actuelle pour mesurer la réussite des programmes d'activité physique comporte certains défis. Ainsi, les appareils de mesure directe, comme les podomètres et les accéléromètres, ne peuvent pas être utilisés pour certains types d'activités, comme la natation et le vélo, par exemple. Par ailleurs, les mesures auto-rapportées sont parfois moins exactes que les mesures directes.<sup>22</sup> Compte tenu du nombre important d'instruments d'enquête existants,<sup>23</sup> il est souvent difficile de comparer les résultats obtenus à partir de différents questionnaires d'autoévaluation et de faire des comparaisons intergouvernementales. Le fait que de nombreuses mesures de l'activité physique chez les enfants et les jeunes tiennent compte des activités pratiquées pendant toute la journée (et non uniquement de celles pratiquées à l'école) complique encore la situation puisqu'il est alors difficile d'identifier et d'évaluer la contribution des diverses interventions en milieu scolaire à l'atteinte des objectifs visés en matière d'activité physique. On peut se servir de registres d'activités détaillés pour identifier les activités pratiquées en milieu scolaire. Ces registres exigent toutefois beaucoup de temps et leur utilisation à grande échelle à des fins d'évaluation est parfois très coûteuse.<sup>24</sup>

#### **Lacunes au niveau des connaissances et orientations entourant des recherches ultérieures**

Les différences observées quant à l'appui des politiques de nutrition et d'activité physique par la direction et l'ensemble de l'école et quant aux niveaux de participation communautaire et de disponibilité des ressources<sup>25,26</sup> peuvent avoir un impact sur l'efficacité de ces politiques.<sup>27</sup> C'est pourquoi il est essentiel, non seulement d'évaluer l'impact de telles politiques à partir des changements observés au niveau du comportement des élèves à l'école (consommation alimentaire, activité physique) et du poids, mais aussi de documenter précisément la nature des interventions en matière de nutrition et d'activité physique et d'évaluer le niveau de mise en œuvre des politiques correspondantes.

Un examen exhaustif récent des approches politiques et environnementales visant à créer un environnement alimentaire sain dans les écoles aux États-Unis<sup>28</sup> a révélé l'utilisation de diverses méthodes d'évaluation à cet égard. Un grand nombre de ces méthodes comportent toutefois des limites parce qu'elles s'appuient sur des données auto-rapportées ou comportent un biais dû à l'ab-

sence de réponse. Un nouveau système qui vient d'être élaboré aux États-Unis permettra aux états d'enregistrer les changements observés dans onze domaines faisant l'objet de politiques, notamment l'alimentation dans les écoles, le marketing des aliments et l'éducation en nutrition.<sup>29</sup> Il est important d'identifier des protocoles de mesure normalisés et des indicateurs de la nutrition et de l'activité physique pouvant être utilisés par les provinces et les territoires au Canada.<sup>7,29</sup> Bien qu'on reconnaisse que les responsables de l'évaluation à l'échelon provincial ou territorial puissent utiliser certaines mesures spécifiques en fonction de leurs propres politiques, l'adoption d'un ensemble commun de méthodes et d'indicateurs permettrait d'effectuer des évaluations plus approfondies dans les provinces, tout en facilitant les comparaisons et en faisant ressortir les obstacles et réussites communs à l'échelon national. Peu importe les méthodes et indicateurs retenus, il faut toujours tenir compte de la faisabilité de l'évaluation, notamment de la charge de travail correspondante et du niveau de coopération attendu de la part des écoles. Certains obstacles restent à surmonter quant à l'obtention de données canadiennes, entre autres la complexité croissante de l'approvisionnement alimentaire et l'obtention du financement nécessaire.

Dans toute démarche d'évaluation, il faut tenir compte du fait qu'il est parfois difficile de vérifier l'impact spécifique de certaines interventions sur la santé et les comportements des élèves. Ainsi, on peut difficilement vérifier l'impact exact de certains éléments des politiques, comme l'organisation d'activités physiques après l'école, l'offre de cours d'éducation physique ou l'accès à de l'équipement sportif, sur le niveau d'activité physique.<sup>30</sup> Par ailleurs, les instruments d'évaluation de l'apport alimentaire doivent être axés avant tout sur les changements les plus probables sur le plan de la consommation alimentaire ou de l'apport nutritionnel, suite à la mise en œuvre d'une politique de nutrition. Ainsi, un projet quinquennal d'évaluation des politiques de nutrition en vigueur dans les écoles primaires de l'Île-du-Prince-Édouard examine les changements attendus au niveau de l'alimentation des élèves au dîner, suite à la mise en œuvre des politiques de nutrition. Cette évaluation tient compte à la fois de la provenance des aliments et du respect des politiques par les écoles; elle permettra de recueillir des données probantes très utiles.<sup>4</sup> À l'heure actuelle, aucune recherche ne vise à évaluer des questions de cette nature chez les élèves des cycles intermédiaire ou secondaire. Il est préférable d'adopter une approche globale d'évaluation, utilisant diverses méthodes, pour obtenir un portrait adéquat du processus complexe de changement associé à l'élaboration et à la mise en œuvre de politiques de nutrition et d'activité physique en milieu scolaire.

Le manque de capacité de recherche est l'un des obstacles à une évaluation approfondie des politiques de nutrition et d'activité physique au Canada. Trop peu de chercheurs en évaluation s'intéressent au domaine de la nutrition et de l'activité physique. Il est donc important d'accroître la capacité de planification et d'évaluation à l'échelon des districts scolaires, des provinces et du pays.<sup>7</sup> Il est aussi essentiel de financer adéquatement la recherche entourant l'efficacité, la rentabilité et la durabilité des politiques de nutrition en milieu scolaire.<sup>31</sup>

## CONCLUSION

L'évaluation des politiques canadiennes de nutrition et d'activité physique en milieu scolaire permettra de mieux comprendre le pro-

cessus d'élaboration de ces politiques et leurs résultats. Cette évaluation permettra aussi d'orienter la prise de décision, de documenter les changements apportés à ces politiques, d'obtenir des données probantes et de rendre des comptes. Le présent article insiste sur l'importance d'identifier des approches et indicateurs communs, d'adopter une approche globale s'inscrivant dans le cadre de l'OMS et de s'assurer que la capacité de recherche et le financement soient suffisants pour augmenter l'efficacité des démarches d'évaluation à l'avenir.

## RÉFÉRENCES

1. Institute of Medicine. *Preventing Childhood Obesity: Health in the Balance*. Washington D.C., National Academies Press, 2005.
2. Raine, K et E. Wilson. « Obesity Prevention in the Canadian Population: Policy Recommendations for Environmental Change », *Canadian Medical Association Journal*, 2007, 176(8), p. 106-109.
3. Budd, G.M. et S.L. Volpe. « School-Based Obesity Prevention: Research, Challenges, and Recommendations », *The Journal of School Health*, 2006, 76(10), p. 485-495.
4. Les diététistes du Canada. « An Overview of School Nutrition Policies », *Current Issues*, septembre 2008. Sur Internet : <http://www.livinghealthyschools.com/pdf/2008/Current%20Issues.pdf> (consulté le 1 février 2009).
5. McKenna, M.L. « Issues in Implementing School Nutrition Policies », *Canadian Journal of Dietetic Practice and Research*, 2003, 64(4), p. 208-213.
6. Organisation mondiale de la santé. *Stratégie mondiale pour l'alimentation, l'exercice physique et la santé : cadre de surveillance et d'évaluation de la mise en œuvre*, Genève, Suisse, OMS, 2006. Sur Internet : <http://www.who.int/dietphysicalactivity/M&E-French-2009.pdf> (consulté le 18 août 2008).
7. Institute of Medicine. *Progress in Preventing Childhood Obesity: How Do We Measure Up?* Washington D.C., National Academies Press, 2007.
8. Lagarde, F. et C.M.A. LeBlanc. *Physical Activity in Schools*. Document d'information pour la table ronde d'experts indépendants de juin 2007 sur la Stratégie mondiale pour l'alimentation, l'exercice physique et la santé de l'OMS : cadre pour une politique scolaire, 2008 (non publié).
9. Boyle, M., M. Purciel, L. Craypo, S. Stone-Francisco et S.E. Samuels. *National Evaluation and Measurement Meeting on School Nutrition and Physical Activity Policies: Final Report, Meeting Proceedings*, San Francisco (Californie), Samuels & Associates, 2004. Sur Internet : <http://epsl.asu.edu/ceru/Articles/CERU-0503-116-OWI.pdf> (consulté le 19 août 2008).
10. Illinois School Wellness Policy Task Force. *Report on the Evaluation of Six School Districts on the Effectiveness of Wellness Policies*, janvier 2008. Sur Internet : [http://www.isbe.net/nutrition/pdf/task\\_force\\_report.pdf](http://www.isbe.net/nutrition/pdf/task_force_report.pdf) (consulté le 10 novembre 2008).
11. Action for Healthy Kids. *Wellness Policy Tool*. Sur Internet : <http://www.actionforhealthykids.org/wellnesstool/Presentations/pres-out652.php> (consulté le 8 novembre 2008).
12. Finkelstein, D.M., E.L. Hill et R.C. Whitaker. « School Food Environments and Policies in US Public Schools », *Pediatrics*, 2008, 122, p. e251-e259.
13. O'Toole, T.P., S. Anderson, C. Miller et J. Guthrie. « Nutrition Services and Foods and Beverages Available at School: Results From the School Health Policies and Programs Study 2006 », *The Journal of School Health*, 2007, 77(8), p. 500-521.
14. Taylor, J., S. Evers et M. McKenna. « Determinants of Healthy Eating in Children and Youth », *Canadian Journal of Public Health*, 2005, 96(suppl.), p. S20-S26.
15. Ministère de l'Éducation et ministère de la Santé de la Colombie-Britannique. *School Food Sales and Policies Provincial Report II*. Sur Internet : [http://www.bced.gov.bc.ca/health/healthy\\_eating/food\\_guidelines/food\\_survey\\_report.htm](http://www.bced.gov.bc.ca/health/healthy_eating/food_guidelines/food_survey_report.htm) (consulté le 2 décembre 2008).
16. Gouvernement du Manitoba. *Manitoba School Nutrition Survey*, 2006. Sur Internet : <http://www.gov.mb.ca/healthyschools/foodinschools/documents/survey.pdf> (consulté le 5 janvier 2009).
17. Leatherdale, S.T., S. Manske, S.L. Wong et R. Cameron. « Integrating Research, Policy, and Practice in School-Based Physical Activity Prevention Programming: The School Health Action, Planning, and Evaluation System (SHAPES) Physical Activity Module », *Health Promotion Practice*, 2009, 10(2), p. 254-261.
18. Robert Wood Johnson Foundation. *Policy Brief: Improved Child Nutrition Policy: Insights From a National USDA Study of School Food Environments*, 2009. Sur Internet : <http://www.rwjf.org/files/research/20090102sndapolicybrief.pdf> (consulté le 27 février 2009).
19. Institut canadien de la recherche sur la condition physique et le mode de vie sain. *Kids CANPLAY! Encouraging Children to Be Active at Home, at School and in Their Communities*, bulletin numéro 1, Ressources et services. Ottawa (Ontario), 2008.
20. Organisation mondiale de la santé. « Inequalities in Young People's Health: HBSC International Report From the 2005/2006 Survey ». Tiré de : Currie, C., S. Gabhainn, E. Godeau, et coll. (dir.), *Health Policy for Children and Adolescents*, No 5, Copenhague, Danemark, Bureau régional de l'Europe de l'OMS, 2008.

21. Lee, S.M., C.R. Burgeson, J.E. Fulton et C.G. Spain. « Physical Education and Physical Activity: Results From the School Health Policies and Programs Study 2006 », *The Journal of School Health*, 2007, 77(8), p. 435-463.
22. Bauman, A., P. Phongsavan, S. Schoeppe et N. Owen. « Physical Activity Measurement – a Primer for Health Promotion », *Promotion & Education*, 2006, 13(2), p. 92-103.
23. Tessier, S., A. Vuillemin et S. Briançon. « Revue des questionnaires de mesure de l'activité physique validés chez les enfants et les adolescents », *Science & Sports*, 2008, 23, p. 118-125.
24. Jago, R., C.B. Anderson, T. Baranowski et K. Watson. « Adolescent Patterns of Physical Activity: Differences by Gender, Day and Time of Day », *American Journal of Preventive Medicine*, 2005, 28(5), p. 447-452.
25. MacLellan, D., J. Taylor et C. Freeze. « Developing school nutrition policies: Enabling and barrier factors », *Canadian Journal of Dietetic Practice and Research*, 2009, 70(4), p. 162-208.
26. Foster, G.D., S. Sherman, K.E. Borradaile, K.M. Grundy, S.S. Vander Veur, J. Nachmani, et coll. « A Policy-Based School Intervention to Prevent Overweight and Obesity », *Pediatrics*, 2008, 121(4), p. e794-e802.
27. Ramanathan, S., K.R. Allison, G. Faulkner, J.J.M. Dwyer. « Challenges in Assessing the Implementation and Effectiveness of Physical Activity and Nutrition Policy Interventions as Natural Experiments », *Health Promotion International*, 2008, 23, p. 290-297.
28. Story, M., K.M. Kaphingst, R. Robinson-O'Brien, K. Glanz. « Creating Healthy Food and Eating Environments: Policy and Environmental Approaches », *Annual Review of Public Health*, 2008, 29, p. 253-272.
29. Masse, L.C., M.M. Frosh, J.F. Chriqui, A.L. Yaroch, T. Aguis-Collins, et coll. « Development of a School Nutrition-Environment State Policy Classification System (SNESPCS) », *American Journal of Preventive Medicine*, 2007, 33(4S), p. S277-S291.
30. Durant, N., S.K. Harris, S. Doyle, S. Person, B.E. Saelens, J. Kerr, et coll. « Relation of the School Environment and Policy to Adolescent Physical Activity », *The Journal of School Health*, 2009, 79, p. 153-159.
31. Brescoll, V., R. Kersh, K.D. Brownell. « Assessing the Feasibility and Impact of Federal Childhood Obesity Policies », *The ANNALS of the American Academy of Political and Social Science*, 2008, 615, p. 178-194.
